# Supplementary material
Source: PubMed Central journal article supplement (PMC7856572)
Supplement: NIHMS1630502-supplement-Supp_info.pdf [file NIHMS1630502-supplement-Supp_info.pdf]

## **Supplementary Information**

Expanded role of the Cu-sensing transcription factor Mac1p in *Candida albicans*

Edward M. Culbertson, Vincent M. Bruno, Brendan P. Cormack, Valeria C. Culotta

### **Includes:**

**Supplementary Figures and Figure Legends for Fig. S1 to S2**

**Supplementary Tables S2 to S4**

**References**

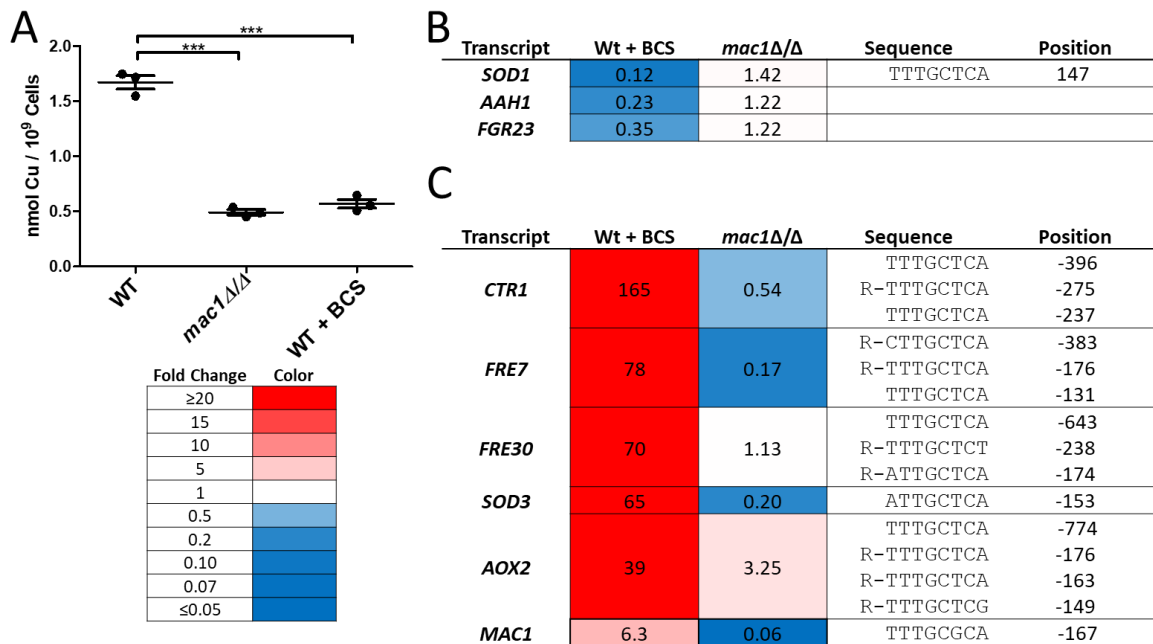

**Figure S1. Genes regulated by Cu starvation in a *MAC1*-dependent manner**

(A) Intracellular Cu levels were determined by AAS as described in *Experimental Procedures* and are shown for the individual cell samples utilized for RNA-seq analysis (n=3). One-way ANOVA with Tukey posttest was used to determine the statistical significance; \*\*\*p≤0.001. The absence of a bracket indicates that comparisons are not significantly different. Within the data points, the bar represents mean with error bars showing the SEM. (B, C) Summary of genes most strongly repressed (B) or induced (C) in WT cells treated with BCS, but not in *mac1Δ/Δ* strains. Comparisons are made to untreated WT control cells. The position and sequence of the Mac1p consensus sites (Woodacre *et al.*, 2008) is shown with an “R” designating if they are located on the opposite strand of DNA.

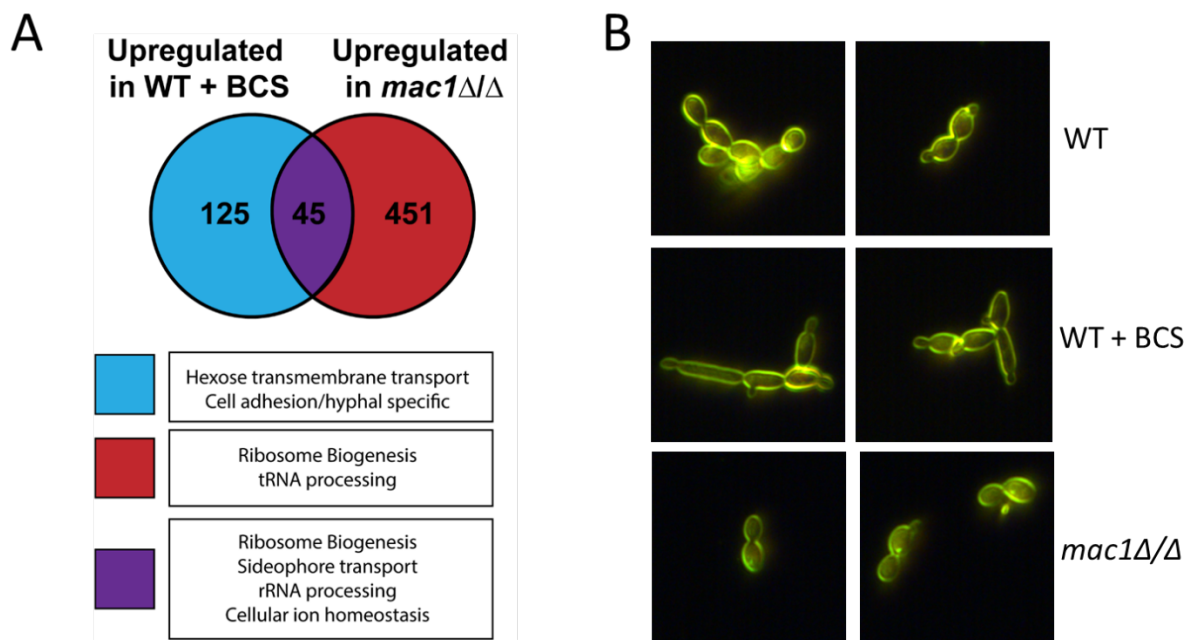

Figure S2. Genes differentially regulated by Cu starved WT versus *mac1Δ/Δ* mutants and hyphal morphology of Cu starved WT cells

(A) Shown is a summary of genes upregulated by >3-fold in WT + 400  $\mu$ M BCS and *mac1Δ/Δ* strains compared to WT untreated control cells. (TOP) Venn diagram shows the total number of genes up-regulated under the two conditions. (BOTTOM) Boxes illustrate enrichment of specific gene categories as determined in part by GO analysis. B) Representative images of cellular morphology after 24 hours of growth in YPD media of WT, WT + 400  $\mu$ M BCS, and *mac1Δ/Δ* cells viewed by dark field microscopy. Strains utilized: WT, SC5314; *mac1Δ/Δ*, EC004.

Table S2: Primers used for Plasmid construction

| Primer Name | Description                                                 | Sequence                      |
|-------------|-------------------------------------------------------------|-------------------------------|
| M1-5L-Sacl  | <i>MAC1</i> -441 to -205 with Sacl site for pEC-M1L         | GGAGCTCGTTTGACAACCTTGCAAT     |
| M1-5L-NotI  | <i>MAC1</i> -441 to -205 with NotI site for pEC-M1L         | GGCGGCCGCACAAGGGAGGGATCAGGA   |
| M1-5S-Sacl  | <i>MAC1</i> -205 to -1 with Sacl site for pEC-M1S           | GGAGCTCAGTTTCACCTAACCATTCCC   |
| M1-5S-NotI  | <i>MAC1</i> -205 to -1 with NotI site for pEC-M1S           | GCGGCCGCTCCTTATTTCAGTCTTGCTTT |
| M1-3L-XhoI  | <i>MAC1</i> 1423 to 1593 with XhoI site for pEC-M1L         | GGCTCGAGCCTGCATACAGCACCAAT    |
| M1-3L-KpnI  | <i>MAC1</i> 1423 to 1593 with KpnI site for pEC-M1L         | GGCTCGAGCCTGCATACAGCACCAAT    |
| M1-3S-XhoI  | Amplify <i>MAC1</i> 1201 to 1419 with XhoI site for pEC-M1S | GGCTCGAGGACAAGAAGGCAACAAAG    |
| M1-3S-KpnI  | Amplify <i>MAC1</i> 1201 to 1419 with KpnI site for pEC-M1S | GGGTACCTCATAGTTCCAAATACCAC    |

Table S3: Primers used for CRISPR

| Primer         | Sequence                                                                                               |
|----------------|--------------------------------------------------------------------------------------------------------|
| Mac1<br>gDNA   | CGTAAACTATTTTTAATTTGAAAGCAAGACTGAATAAGGAGTTTTAGAGCTA<br>GAAATAGC                                       |
| SOD1<br>gDNA   | CGTAAACTATTTTTAATTTGCAACATATATATAATTTAAAGTTTTAGAGCTAG<br>AAATAGC                                       |
| MAC1<br>dDNA F | TCGTACCTTAAGTTAGACTATTTACAAAAATTTACATATACAGTTCATCCC<br>CTTATTCAGTCTTGCTTTTTGGAGGGGATCTAGTGACATGTAAACAT |
| MAC1<br>dDNA R | AGTTTTACATGTCACTAGATCCCCTCCAAAAGCAAGACTGAATAAGGGGA<br>TGAAGTGTATATGTAAATTTTTGTAAATAGTCTAACTTAAGGTACGA  |
| SOD1<br>dDNA F | TTCTTGGGTTGGATTGTTGATGATGATGGCAATCTTGGCTCATCTATTCCTT<br>TTAATTATATATATGTTGATAATTGAATTGAATTGAATTGATCTTT |
| SOD1<br>dDNA R | AAAGATCAATTCAATTCAATTCAATTATCAACATATATATAATTTAAAGGAAT<br>AGATGAGCCAAGATTGCCATCATCATCAACAATCCAACCCAAGAA |

Table S4: Primers used for qRT-PCR reactions

| Primer Name   | Sequence                  | Reference                        |
|---------------|---------------------------|----------------------------------|
| <i>TUB2 F</i> | GAGTTGGTGATCAATTCAGTGCTAT | (Li <i>et al.</i> , 2015)        |
| <i>TUB2 R</i> | ATGGCGGCATCTTCTAATGGGATTT | (Li <i>et al.</i> , 2015)        |
| <i>CFL4 F</i> | CGAGAGTAAAGAGCCGTTGC      | (Moran, 2012)                    |
| <i>CFL5 R</i> | CATTGCTGGATGACCACAAG      | (Moran, 2012)                    |
| <i>SOD4 F</i> | CTTGACGAAGGTGACGATACTGCAA | (Schatzman <i>et al.</i> , 2020) |
| <i>SOD4 R</i> | TTAAAGCAGCAACAACACCGGCAAT | (Schatzman <i>et al.</i> , 2020) |
| <i>CTR1 F</i> | CAAAAGCTCGTGGAACCGGTAAATC | (Li <i>et al.</i> , 2015)        |
| <i>CTR1 R</i> | TCAGCAACAAATCTTCCAACACCGG | (Li <i>et al.</i> , 2015)        |

References:

- Li, C.X., Gleason, J.E., Zhang, S.X., Bruno, V.M., Cormack, B.P., and Culotta, V.C. (2015) *Candida albicans* adapts to host copper during infection by swapping metal cofactors for superoxide dismutase. *Proc Natl Acad Sci U S A*.
- Moran, G.P. (2012) Transcript profiling reveals rewiring of iron assimilation gene expression in *Candida albicans* and *C. dubliniensis*. *FEMS Yeast Res* **12**: 918-923.
- Schatzman, S.S., Peterson, R.L., Teka, M., He, B., Cabelli, D.E., Cormack, B.P., and Culotta, V.C. (2020) Copper-only superoxide dismutase enzymes and iron starvation stress in *Candida* fungal pathogens. *J Biol Chem* **295**: 570-583.
- Woodacre, A., Mason, R.P., Jeeves, R.E., and Cashmore, A.M. (2008) Copper-dependent transcriptional regulation by *Candida albicans* Mac1p. *Microbiology* **154**: 1502-1512.
